# Supplementary material for: The variability in Gaseous Elemental Mercury at Villum Research Station, Station Nord in North Greenland from 1999 to 2017
Source: Copernicus journal article supplement (doi:10.5194/acp-2019-912), 2020-02-24

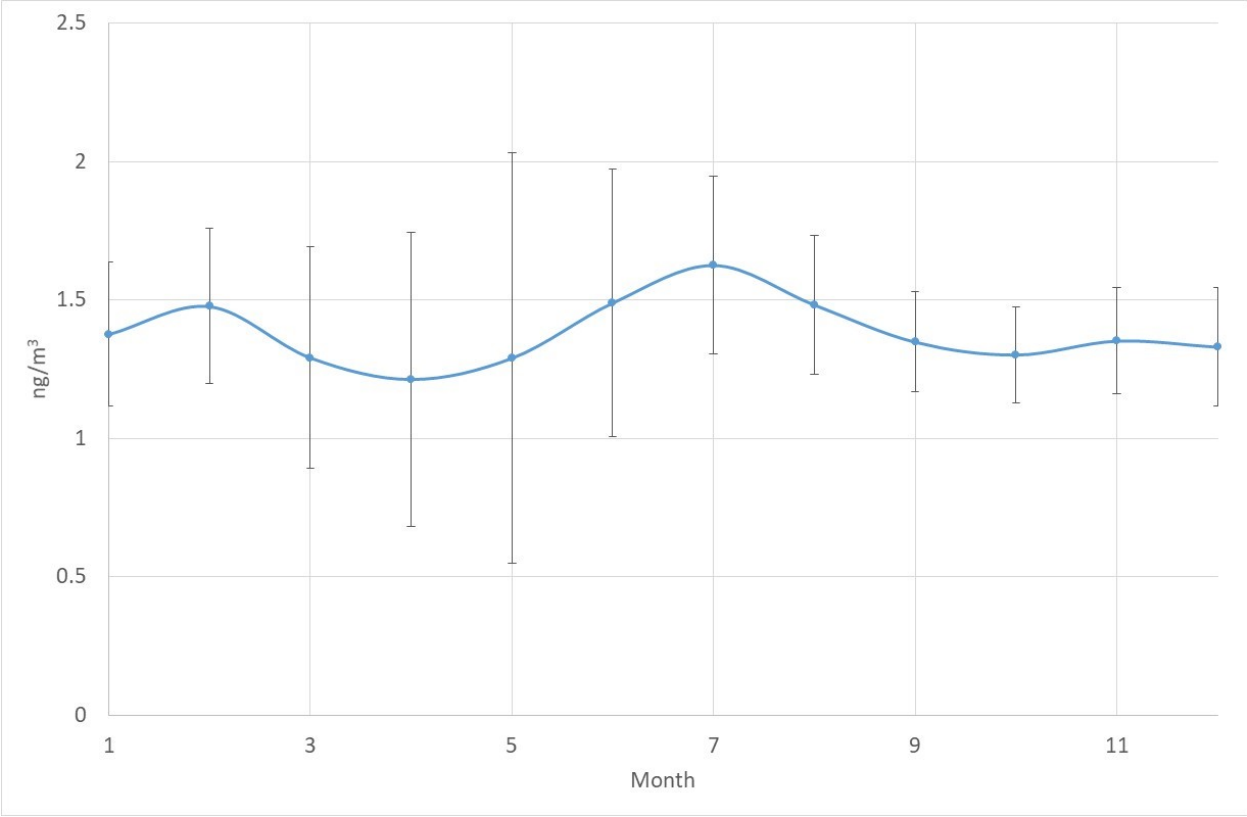

Supplement: Supplementary file [file acp-2019-912-AC1-supplement.pdf]
